# Supplementary material for: Dung Beetle Assemblages Attracted to Cow and Horse Dung: The Importance of Mouthpart Traits, Body Size, and Nesting Behavior in the Community Assembly Process
Source: MDPI journal article supplement (doi:10.3390/life11090873), 2021-08-25
Supplement: s1 [file s1]

Article

# Dung Beetle Assemblages Attracted to Cow and Horse Dung: The Importance of Mouthpart Traits, Body Size, and Nesting Behavior in the Community Assembly Process

Mattia Tonelli <sup>1,2,\*</sup>, Victoria C. Giménez Gómez <sup>3</sup>, José R. Verdú <sup>2</sup>, Fernando Casanoves <sup>4</sup> and Mario Zunino <sup>5</sup>

**Table S4.** Results of the Linear Mixed Model regarding the CWM, *FDvar* and *FRO* of dung beetle functional traits in cow and horse dung. The boxes with a slash (/) represent cases in which the absence of variability in the index did not allow us to estimate the model and the pairwise comparison. Significant *P* values are highlighted in bold.

| TRAIT TYPE           | TRAIT NAME                                        | CWM            |                |                  |               | FDvar               |                     |                  |               | FRO             |                 |                  |               |
|----------------------|---------------------------------------------------|----------------|----------------|------------------|---------------|---------------------|---------------------|------------------|---------------|-----------------|-----------------|------------------|---------------|
|                      |                                                   | DUNG TYPE      |                | <i>F</i> (1, 24) | <i>P</i>      | DUNG TYPE           |                     | <i>F</i> (1, 28) | <i>P</i>      | DUNG TYPE       |                 | <i>F</i> (1, 28) | <i>P</i>      |
|                      |                                                   | Cow            | Horse          |                  |               | Cow                 | Horse               |                  |               | Cow             | Horse           |                  |               |
| Body Morphology      | Fresh body mass                                   | 44.612 ± 7.309 | 33.526 ± 7.309 | 12.401           | <b>0.0017</b> | 0.85 ± 0.02         | 0.83 ± 0.02         | 0.27             | 0.6082        | 0.22 ± 0.02     | 0.25 ± 0.02     | 0.94             | 0.3404        |
|                      | Sphericity                                        | 0.606 ± 0.004  | 0.607 ± 0.004  | 1.153            | 0.2937        | 2.6 E-03 ± 4.9 E-04 | 1.7 E-03 ± 4.9 E-04 | 1.40             | 0.2464        | 0.36 ± 0.02     | 0.36 ± 0.02     | 0.05             | 0.8207        |
|                      | Head area/Total area Ratio                        | 0.097 ± 0.004  | 0.094 ± 0.004  | 2.301            | 0.1424        | 0.10 ± 0.01         | 0.08 ± 0.01         | 2.65             | 0.1151        | 0.41 ± 0.02     | 0.37 ± 0.02     | 2.75             | 0.1084        |
|                      | Hind tibiae length                                | 1.501 ± 0.122  | 1.365 ± 0.122  | 17.642           | <b>0.0003</b> | 0.28 ± 0.03         | 0.21 ± 0.03         | 3.57             | 0.0693        | 0.32 ± 0.02     | 0.28 ± 0.02     | 1.98             | 0.1702        |
|                      | Metemesosternal area                              | 2.658 ± 0.626  | 2.313 ± 0.626  | 2.395            | 0.1348        | 0.87 ± 0.01         | 0.85 ± 0.01         | 1.88             | 0.1817        | 0.26 ± 0.03     | 0.29 ± 0.03     | 0.44             | 0.5128        |
|                      | Abdomen length                                    | 1.707 ± 0.126  | 1.622 ± 0.126  | 4.296            | <b>0.0491</b> | 0.23 ± 0.02         | 0.20 ± 0.02         | 1.48             | 0.2344        | 0.27 ± 0.02     | 0.27 ± 0.02     | 0.01             | 0.9376        |
|                      | Wing load                                         | 0.874 ± 0.158  | 0.748 ± 0.158  | 5.101            | <b>0.0333</b> | 0.70 ± 0.05         | 0.59 ± 0.05         | 3.05             | 0.0916        | 0.38 ± 0.02     | 0.36 ± 0.02     | 0.66             | 0.4221        |
| Mouthpart Morphology | Number of teeth in the mandibles profile          | 0.019 ± 0.005  | 0.008 ± 0.005  | 4.251            | 0.0502        | 1.00 ± 0.05         | 0.93 ± 0.05         | 1.00             | 0.3259        | 0.07 ± 0.01     | 0.08 ± 0.01     | 0.01             | 0.9167        |
|                      | Conjunctive/total mandible area ratio             | 0.097 ± 0.002  | 0.098 ± 0.002  | 0.539            | 0.4701        | 0.05 ± 0.01         | 0.03 ± 0.01         | 5.17             | <b>0.0308</b> | 0.34 ± 0.02     | 0.36 ± 0.02     | 0.89             | 0.3527        |
|                      | Percentage of filtering area of mandibular molars | 0.882 ± 0.021  | 0.869 ± 0.021  | 3.175            | 0.0875        | 0.02 ± 2.9 E-03     | 0.02 ± 2.9 E-03     | 1.06             | 0.3125        | 0.36 ± 0.02     | 0.41 ± 0.02     | 5.00             | <b>0.0335</b> |
|                      | Zygom developed                                   | 0.591 ± 0.084  | 0.741 ± 0.084  | 9.905            | <b>0.0044</b> | /                   | /                   | /                | /             | 0.04 ± 3.1 E-03 | 0.05 ± 3.1 E-03 | 1.56             | 0.2217        |
|                      | Zygom underdeveloped                              | 0.409 ± 0.084  | 0.259 ± 0.084  | 9.905            | <b>0.0044</b> | /                   | /                   | /                | /             | 0.04 ± 3.1 E-03 | 0.05 ± 3.1 E-03 | 1.56             | 0.2217        |
| Ethological          | Trophic diversity                                 | 60.529 ± 0.499 | 60.256 ± 0.499 | 0.901            | 0.3520        | 0.03 ± 0.01         | 0.03 ± 0.01         | 0.11             | 0.7414        | 0.19 ± 0.01     | 0.19 ± 0.01     | 2.1 E-04         | 0.9885        |

|                                                                                                     |                     |                     |       |               |             |             |      |        |                 |                 |      |        |
|-----------------------------------------------------------------------------------------------------|---------------------|---------------------|-------|---------------|-------------|-------------|------|--------|-----------------|-----------------|------|--------|
| Nest type 0 (no-nester)                                                                             | 0.402 ± 0.143       | 0.533 ± 0.143       | 4.963 | <b>0.0355</b> | /           | /           | /    | /      | 0.04 ± 3.4 E-03 | 0.05 ± 3.1 E-03 | 1.56 | 0.2217 |
| Nest type 1 (Nest composed of a single brood mass located within the excrement)                     | 8.5 E-05 ± 5.0 E-05 | 0.000 ± 5.0 E-05    | 2.581 | 0.1212        | 0.13 ± 0.06 | 0.00 ± 0.06 | 2.15 | 0.1534 | /               | /               | /    | /      |
| Nest type 3 (Nest composed of a single brood mass located underground in a simple nest)             | 0.086 ± 0.024       | 0.017 ± 0.024       | 7.626 | <b>0.0109</b> | /           | /           | /    | /      | 0.04 ± 3.4 E-03 | 0.05 ± 3.1 E-03 | 1.56 | 0.2217 |
| Nest type 5 (Nest composed of several isolated brood masses located underground in a compound nest) | 0.479 ± 0.133       | 0.440 ± 0.133       | 0.518 | 0.4785        | /           | /           | /    | /      | 0.04 ± 3.4 E-03 | 0.05 ± 3.1 E-03 | 1.56 | 0.2217 |
| Nest type 7 (Nest composed of a single brood ball located underground in a simple nest)             | 0.032 ± 0.021       | 0.010 ± 0.021       | 4.890 | <b>0.0368</b> | 0.53 ± 0.13 | 0.40 ± 0.13 | 0.51 | 0.4814 | 0.04 ± 3.4 E-03 | 0.04 ± 3.9 E-03 | 0.71 | 0.4151 |
| Nest type 9 (Nest composed of several brood balls per chamber located underground in a simple nest) | 3.7 E-04 ± 2.0 E-04 | 2.4 E-04 ± 2.0 E-04 | 0.464 | 0.5025        | 0.40 ± 0.12 | 0.27 ± 0.12 | 0.57 | 0.4560 | 0.04 ± 2.9 E-03 | 0.04 ± 3.6 E-03 | 0.02 | 0.8979 |
| Nest depth 0 (within excrement)                                                                     | 0.399 ± 0.142       | 0.532 ± 0.142       | 5.035 | <b>0.0343</b> | /           | /           | /    | /      | 0.04 ± 3.1 E-03 | 0.05 ± 3.1 E-03 | 1.56 | 0.2217 |
| Nest depth 1 (dung-soil interphase)                                                                 | 0.008 ± 0.003       | 0.003 ± 0.003       | 3.683 | 0.0669        | 0.93 ± 0.10 | 0.67 ± 0.10 | 3.50 | 0.0719 | 0.04 ± 2.8 E-03 | 0.04 ± 3.4 E-03 | 0.30 | 0.5914 |
| Nest depth 2 (little depth)                                                                         | 0.279 ± 0.090       | 0.224 ± 0.090       | 2.167 | 0.1540        | /           | /           | /    | /      | 0.04 ± 3.1 E-03 | 0.05 ± 3.1 E-03 | 1.56 | 0.2217 |
| Nest depth 3 (great depth)                                                                          | 0.314 ± 0.083       | 0.241 ± 0.083       | 2.849 | 0.1044        | /           | /           | /    | /      | 0.04 ± 3.1 E-03 | 0.05 ± 3.1 E-03 | 1.56 | 0.2217 |
| Horizontal nest distance 0 (within food source)                                                     | 0.956 ± 0.020       | 0.984 ± 0.020       | 8.042 | <b>0.0091</b> | /           | /           | /    | /      | 0.04 ± 3.1 E-03 | 0.05 ± 3.1 E-03 | 1.56 | 0.2217 |
| Horizontal nest distance 1 (starting within food source but with a                                  | 0.012 ± 0.003       | 0.006 ± 0.003       | 4.780 | <b>0.0388</b> | /           | /           | /    | /      | 0.04 ± 3.1 E-03 | 0.05 ± 3.1 E-03 | 1.56 | 0.2217 |

|                                                                                                                                 |                     |                  |       |               |             |             |      |        |                 |                 |      |        |
|---------------------------------------------------------------------------------------------------------------------------------|---------------------|------------------|-------|---------------|-------------|-------------|------|--------|-----------------|-----------------|------|--------|
| horizontal extension)                                                                                                           |                     |                  |       |               |             |             |      |        |                 |                 |      |        |
| Horizontal nest distance 3 (a great distance out from the food source)                                                          | 0.032 ± 0.021       | 0.010 ± 0.021    | 4.890 | <b>0.0368</b> | 0.53 ± 0.13 | 0.40 ± 0.13 | 0.51 | 0.4814 | 0.04 ± 3.4 E-03 | 0.04 ± 3.9 E-03 | 0.71 | 0.4151 |
| Nesting patterns 2 (Telecoprid medium-little sized)                                                                             | 0.032 ± 0.021       | 0.010 ± 0.021    | 4.890 | <b>0.0368</b> | 0.53 ± 0.13 | 0.40 ± 0.13 | 0.51 | 0.4814 | 0.04 ± 3.4 E-03 | 0.04 ± 3.9 E-03 | 0.71 | 0.4151 |
| Nesting patterns 5 (Paracoprid with large body size)                                                                            | 0.015 ± 0.005       | 0.006 ± 0.005    | 7.488 | <b>0.0115</b> | /           | /           | /    | /      | 0.04 ± 3.1 E-03 | 0.05 ± 3.1 E-03 | 1.56 | 0.2217 |
| Nesting patterns 7 (Paracoprid with small body size burying dung slowly and at shallow depth with well-developed brood mass)    | 0.464 ± 0.134       | 0.434 ± 0.134    | 0.326 | 0.5731        | /           | /           | /    | /      | 0.04 ± 3.1 E-03 | 0.05 ± 3.1 E-03 | 1.56 | 0.2217 |
| Nesting patterns 8 (Paracoprid with small body size burying dung slowly and at shallow depth without well-developed brood mass) | 0.086 ± 0.024       | 0.017 ± 0.024    | 7.641 | <b>0.018</b>  | /           | /           | /    | /      | 0.04 ± 3.1 E-03 | 0.05 ± 3.1 E-03 | 1.56 | 0.2217 |
| Nesting patterns 10 (Cleptocoprid)                                                                                              | 0.005 ± 0.001       | 0.005 ± 0.001    | 0.038 | 0.8476        | /           | /           | /    | /      | 0.04 ± 3.1 E-03 | 0.05 ± 3.1 E-03 | 1.56 | 0.2217 |
| Nesting patterns 11 (non-nester)                                                                                                | 0.397 ± 0.143       | 0.529 ± 0.143    | 4.991 | <b>0.0351</b> | /           | /           | /    | /      | 0.04 ± 3.1 E-03 | 0.05 ± 3.1 E-03 | 1.56 | 0.2217 |
| Daily activity nocturnal                                                                                                        | 0.016 ± 0.010       | 0.034 ± 0.010    | 2.842 | 0.1048        | /           | /           | /    | /      | 0.04 ± 3.1 E-03 | 0.05 ± 3.1 E-03 | 1.56 | 0.2217 |
| Daily activity diurnal                                                                                                          | 0.984 ± 0.010       | 0.966 ± 0.010    | 2.842 | 0.1048        | /           | /           | /    | /      | 0.04 ± 3.1 E-03 | 0.05 ± 3.1 E-03 | 1.56 | 0.2217 |
| Phenology 1 (Autumn, winter and spring)                                                                                         | 0.333 ± 0.162       | 0.478 ± 0.162    | 6.203 | <b>0.0201</b> | /           | /           | /    | /      | 0.04 ± 3.1 E-03 | 0.05 ± 3.1 E-03 | 1.56 | 0.2217 |
| Phenology 2 (Winter and spring)                                                                                                 | 0.003 ± 0.001       | 0.001 ± 0.001    | 2.204 | 0.1506        | 0.67 ± 0.13 | 0.60 ± 0.13 | 0.13 | 0.7165 | 0.04 ± 3.8 E-03 | 0.04 ± 4.0 E-03 | 0.14 | 0.7163 |
| Phenology 3 (Spring)                                                                                                            | 1.4 E-04 ± 6.9 E-05 | 0.000 ± 6.9 E-05 | 2.151 | 0.1555        | 0.13 ± 0.06 | 0.00 ± 0.06 | 2.15 | 0.1534 | /               | /               | /    | /      |
| Phenology 5 (Spring and summer)                                                                                                 | 0.320 ± 0.118       | 0.293 ± 0.118    | 0.648 | 0.4287        | /           | /           | /    | /      | 0.04 ± 3.1 E-03 | 0.05 ± 3.1 E-03 | 1.56 | 0.2217 |

|                                                  |                        |                                |        |                   |                |                |      |               |                        |                        |      |        |
|--------------------------------------------------|------------------------|--------------------------------|--------|-------------------|----------------|----------------|------|---------------|------------------------|------------------------|------|--------|
| Phenology 7<br>(Spring,<br>summer and<br>autumn) | 0.285<br>±<br>0.103    | 0.197<br>±<br>0.103            | 3.648  | 0.0681            | /              | /              | /    | /             | 0.04 ±<br>3.1 E-<br>03 | 0.05 ±<br>3.1 E-<br>03 | 1.56 | 0.2217 |
| Phenology 8<br>(Summer and<br>autumn)            | 0.016<br>±<br>0.004    | 0.007<br>±<br>0.004            | 4.363  | <b>0.0475</b>     | /              | /              | /    | /             | 0.04 ±<br>3.1 E-<br>03 | 0.05 ±<br>3.1 E-<br>03 | 1.56 | 0.2217 |
| Phenology 11<br>(Autumn)                         | 0.040<br>±<br>0.012    | 0.024<br>±<br>0.012            | 1.388  | 0.2503            | /              | /              | /    | /             | 0.04 ±<br>3.1 E-<br>03 | 0.05 ±<br>3.1 E-<br>03 | 1.56 | 0.2217 |
| Phenology 14<br>(All year)                       | 0.002<br>± 4.4<br>E-04 | 4.8 E-<br>04 ±<br>4.4 E-<br>04 | 29.792 | <b>&lt;0.0001</b> | 0.93 ±<br>0.11 | 0.47 ±<br>0.11 | 9.80 | <b>0.0041</b> | 0.04 ±<br>2.8 E-<br>03 | 0.04 ±<br>4.0 E-<br>03 | 0.21 | 0.6544 |
